# Supplementary material for: Smad4 Feedback Enhances BMPR1B Transcription in Ovine Granulosa Cells
Source: MDPI journal article supplement (doi:10.3390/ijms20112732), 2019-06-04
Supplement: s1 [file s1]

**Variant I 5'-UTR**

1 CAGGATTAGA GCTGCCTACG GTGCTGGGCT CTTTAGTGGA CACCCCTGGC AGTTCCGTGC  
61 ATCCTCCTCA TGTCTCATCC CAGGGAACCT GGCAACGATC TTACAAGCGT ACAGAAATCG  
121 CGACAAACTT CCTTGATAAC

**Variant II 5'-UTR**

1 AGTTTGTAAC AGGCTTGTCT TTCACGGTCC TGTGTAGGGC TTGCTGGCAG GCTTGCCGGA  
61 AGCTCTGACA AGAGTGGCAG CAGAGGAGTC TCCGTGAAAG AAGCAAGGCA AGAAACAGGA  
121 GGCTTAAACA GCAAACCTCC TTGATAAC

**Variant III 5'-UTR**

1 TAAATCATCA AGGACGTTCT ACACTTTGGT TATCAGCAGC CTGTTTATCT GGTTCAAACT  
61 TCTGCTGAAT CACAAGCATT TTCCGTTGAG CTATGACAAG AGAGGATACA AAAAGTTAAA  
121 CAAGCAAGCC TGTCATACGT AGAAGACTCT AGATTGCTGC TGCTGCTAAG TCACTTCAGT  
181 CATGTCCGAC TCTGTGTGAC CCCATAGACA ACAGCCCACC AGGCTCCCCC GTCCTGGGA  
241 TTCTCCAGCA AACTTCCTTG ATAAC

**Figure S1.** The sequences of the 5'-UTR of the ovine BMPRI1B gene. Black letters indicate shared partial sequences of exon 2.
